# Supplementary material for: Androgenic-Induced Transposable Elements Dependent Sequence Variation in Barley
Source: MDPI journal article supplement (doi:10.3390/ijms22136783), 2021-06-24
Supplement: s1 [file s1]

## Androgenic-induced transposable elements dependent sequence variation in barley

Renata Orłowska<sup>1\*</sup>, Katarzyna A. Pachota<sup>2</sup>, Wioletta Dynkowska<sup>1</sup>, Agnieszka Niedziela<sup>1</sup>,

Piotr T. Bednarek<sup>1</sup>

<sup>1</sup>Department of Plant Physiology and Biochemistry, Plant Breeding and Acclimatization

Institute – National Research Institute, Radzików, 05-870 Błonie, Poland

<sup>2</sup>Department of Plant Physiology and Biochemistry, Plant Breeding and Acclimatization

Institute – National Research Institute, Radzików, 05-870 Błonie, Poland; Currently does not work at the Institute

Corresponding author: r.orłowska@ihar.edu.pl;

**Supplementary Table 1** Oligonucleotide sequences for MSTD approach based on metAFLP.

| metAFLP oligomer                                                                                     |                                    |
|------------------------------------------------------------------------------------------------------|------------------------------------|
| Adaptors                                                                                             | Sequence 5'→3'                     |
| Ad1 <i>Acc65I</i>                                                                                    | CTC GTA GCA TGC GTA CA             |
| Ad2 <i>Acc65I</i>                                                                                    | GTA CTG TAC GCA TGC TAC            |
| Ad1 <i>KpnI</i>                                                                                      | CTC GTA GCA TGC GTA CAG TAC        |
| Ad2 <i>KpnI</i>                                                                                      | TGT ACG CAT GCT AC                 |
| Ad1 <i>MseI</i>                                                                                      | TAC TCA GGA CTC ATC                |
| Ad2 <i>MseI</i>                                                                                      | GAC GAT GAG TCC TGA G              |
| Preselective primers                                                                                 |                                    |
| Presel <i>Acc56I/KpnI</i>                                                                            | GCA TGC GTA CAG TAC C              |
| Presel <i>MseI</i>                                                                                   | GAT GAG TCC TGA GTA AC             |
| Selective primers                                                                                    |                                    |
| Oligonucleotide targeting sequences containing a methylation motif (metAFLP)                         | Sekwencja 5'→3'                    |
| CpG-GCA                                                                                              | CA TGC GTA CAG TAC CGC A           |
| CpXpG-AGA                                                                                            | CA TGC GTA CAG TAC CAG A           |
| CpXpX-TAA                                                                                            | CA TGC GTA CAG TAC CTA A           |
| Oligonucleotide targeting transposable element sequences (radiolabeled with P <sup>32</sup> ) (MSTD) | 5'→3'                              |
| BARE-1-5980 ( <i>Ty1-copia</i> )                                                                     | CTA GGG CAT AAT TCC AAC AA         |
| BARE-1-C0700 ( <i>Ty1-copia</i> )                                                                    | ACA CAC AAA GCA TTC CTC CGC        |
| BAGY-1-C2043 ( <i>Ty3-gypsy</i> )                                                                    | TCGTCG CCG GCG TCA TCT CC          |
| BAGY-1-C0651 ( <i>Ty3-gypsy</i> )                                                                    | CTA TAC TTG ATT AGG GTT CCA GGG    |
| Sabrina-C0945 ( <i>Ty3-gypsy</i> )                                                                   | GCA AGC TTC CGT TTC CGC            |
| Sukkula E0228 (LARD)                                                                                 | GGA ACG TCG GCA TCG GGC TG         |
| Sukkula 91673 (LARD)                                                                                 | TGT GAC AGC CCG ATG CCG<br>ACGTTCC |
| Balduin (CACTA)                                                                                      | CAG CTA GCA GAC AAC AAG GA         |
| CASP-124R (CACTA)                                                                                    | AAA GGG GAA CAC GAG AAG A          |
| CASP-1F (CACTA)                                                                                      | GAT GAA GAA GAA GAG AAC GA         |

|                  |                            |
|------------------|----------------------------|
| CASP-1R (CACTA)  | CCC AAA TGA AGT GAA AAC C  |
| CAS AY16F (TRIM) | CAT TCG AAC AGA ACT CCC A  |
| CAS AY16R (TRIM) | CAC ATA CAC CAC CAC TCA    |
| CAS 978 (TRIM)   | GGT GTG TCC GGG GCG TTA CA |
| CAS 979 (TRIM)   | CCG GGA GCC CAT TCG AAC    |
